# Supplementary material for: Isolation of Listeria ivanovii from Bulk-Tank Milk of Sheep and Goat Farms—From Clinical Work to Bioinformatics Studies: Prevalence, Association with Milk Quality, Antibiotic Susceptibility, Predictors, Whole Genome Sequence and Phylogenetic Relationships
Source: MDPI journal article supplement (doi:10.3390/biology11060871), 2022-06-06
Supplement: s1 [file s1]

# Isolation of *Listeria ivanovii* from bulk-tank milk of sheep and goats farms: prevalence, association with milk quality, antibiotic susceptibility, predictors, whole genome sequence and phylogenetic relationships

Daphne T. Lianou<sup>†</sup>, Anargyros Skoulakis<sup>†</sup>, Charalambia K. Michael, Eleni I. Katsarou, Dimitrios C. Chatzopoulos, Nikolaos Solomakos, Katerina Tsilipounidaki, Zoe Florou, Peter J. Cripps, Angeliki I. Katsafadou, Natalia G.C. Vasileiou, Konstantina S. Dimoveli, Maria V. Bourganou, Dimitra V. Liagka, Vasileios G. Papatsiros <sup>1</sup>, Panagiota I. Kontou, Vasia S. Mavrogianni, Mariangela Caroprese, Efthymia Petinaki, George C. Fthenakis

<sup>†</sup> These authors have contributed equally and their names are listed alphabetically.

**Table S1.** Classification of articles found in Web of Science presenting work related to *Listeria ivanovii*, in accord with the topic presented therein and the origin of the study (by country).

|                                 |                                                                                                       | <i>n</i>   |
|---------------------------------|-------------------------------------------------------------------------------------------------------|------------|
| <b>Total number of articles</b> |                                                                                                       | <b>355</b> |
| 1.                              | Characteristics of the organism                                                                       | 103        |
| 2.                              | Isolation of the organism from samples from foods                                                     | 92         |
| 2.1.                            | Isolation from meat and meat products                                                                 | 34         |
| 2.2.                            | Isolation from dairy products                                                                         | 23         |
| 2.3.                            | Isolation from fish and seafood                                                                       | 15         |
| 2.4.                            | Isolation from vegetables                                                                             | 11         |
| 2.5.                            | Isolation from ready-to-eat foods                                                                     | 9          |
| 2.6.                            | Isolation of tomatoes                                                                                 | 2          |
| 2.7.                            | Isolation from fruits                                                                                 | 1          |
| 2.8.                            | Isolation from infant food                                                                            | 1          |
| 2.9.                            | Isolation from pet snacks                                                                             | 1          |
| 2.10.                           | Isolation from other foods                                                                            | 2          |
| 2.A.                            | Origin (by country) of the 92 articles referring to isolation of the organism from samples from foods |            |
|                                 | Algeria                                                                                               | 1          |
|                                 | Bulgaria                                                                                              | 2          |
|                                 | Colombia                                                                                              | 1          |
|                                 | Ethiopia                                                                                              | 1          |
|                                 | India                                                                                                 | 4          |
|                                 | Italy                                                                                                 | 5          |
|                                 | Mexico                                                                                                | 3          |
|                                 | Australia                                                                                             | 1          |
|                                 | Canada                                                                                                | 2          |
|                                 | Costa Rica                                                                                            | 1          |
|                                 | Germany                                                                                               | 3          |
|                                 | Iran                                                                                                  | 7          |
|                                 | Jordan                                                                                                | 5          |
|                                 | Nigeria                                                                                               | 3          |
|                                 | Brazil                                                                                                | 1          |
|                                 | PR China                                                                                              | 2          |
|                                 | Egypt                                                                                                 | 2          |
|                                 | Greece                                                                                                | 1          |
|                                 | Ireland                                                                                               | 1          |
|                                 | Malaysia                                                                                              | 3          |
|                                 | Portugal                                                                                              | 1          |

|                                                                 |                                                                                                                    |                          |   |                          |    |
|-----------------------------------------------------------------|--------------------------------------------------------------------------------------------------------------------|--------------------------|---|--------------------------|----|
| Saudi Arabia                                                    | 1                                                                                                                  | Rep. South Africa        | 2 | South Korea              | 2  |
| Spain                                                           | 8                                                                                                                  | Sudan                    | 1 | Taiwan                   | 1  |
| Thailand                                                        | 3                                                                                                                  | Trinidad & Tobago        | 1 | Turkey                   | 9  |
| United Kingdom                                                  | 1                                                                                                                  | United States of America | 9 | Venezuela                | 4  |
| 3. Diagnostics                                                  |                                                                                                                    |                          |   | 72                       |    |
| 4. Isolation of the organism from clinical samples from animals |                                                                                                                    |                          |   | 37                       |    |
| 4.1.                                                            | Isolation from clinical samples from sheep                                                                         |                          |   | 12                       |    |
| 4.2.                                                            | Isolation from clinical samples from cattle                                                                        |                          |   | 8                        |    |
| 4.3.                                                            | Isolation from clinical samples from buffaloes                                                                     |                          |   | 3                        |    |
| 4.4.                                                            | Isolation from clinical samples from rodents                                                                       |                          |   | 3                        |    |
| 4.5.                                                            | Isolation from clinical samples from terrestrial wildlife animals                                                  |                          |   | 3                        |    |
| 4.6.                                                            | Isolation from clinical samples from goats                                                                         |                          |   | 2                        |    |
| 4.7.                                                            | Isolation from clinical samples from pigs                                                                          |                          |   | 2                        |    |
| 4.8.                                                            | Isolation from clinical samples from poultry                                                                       |                          |   | 2                        |    |
| 4.9.                                                            | Isolation from clinical samples from chinchilla                                                                    |                          |   | 1                        |    |
| 4.10.                                                           | Isolation from clinical samples from guinea pigs                                                                   |                          |   | 1                        |    |
| 4.11.                                                           | Isolation from clinical samples from sea mammals                                                                   |                          |   | 1                        |    |
| 4.12.                                                           | Isolation from clinical samples from zoo animals                                                                   |                          |   | 1                        |    |
| 4.A.                                                            | Origin (by country) of articles referring to isolation of the organism from clinical samples from animals          |                          |   |                          |    |
| Australia                                                       | 2                                                                                                                  | Belgium                  | 2 | Egypt                    | 1  |
| France                                                          | 1                                                                                                                  | Germany                  | 3 | India                    | 12 |
| Iran                                                            | 1                                                                                                                  | Israel                   | 1 | Kenya                    | 1  |
| Poland                                                          | 1                                                                                                                  | Spain                    | 4 | Switzerland              | 1  |
| Turkey                                                          | 3                                                                                                                  | United Kingdom           | 3 | United States of America | 1  |
| 4.12.                                                           | Isolation from clinical samples from humans                                                                        |                          |   | 6                        |    |
| 4.B.                                                            | Origin (by country) of articles referring to isolation of the organism from clinical samples from people           |                          |   |                          |    |
| France                                                          | 2                                                                                                                  | Germany                  | 1 | Israel                   | 1  |
| Spain                                                           | 1                                                                                                                  | United Kingdom           | 2 |                          |    |
| 5. Isolation of the organism from environmental samples         |                                                                                                                    |                          |   | 19                       |    |
| 5.1.                                                            | Isolation from samples from food-related environments                                                              |                          |   | 6                        |    |
| 5.A.                                                            | Origin (by country) of articles referring to isolation of the organism from samples from food-related environments |                          |   |                          |    |
| Colombia                                                        | 1                                                                                                                  | India                    | 1 | Ireland                  | 1  |
| Italy                                                           | 1                                                                                                                  | Portugal                 | 1 | Slovakia                 | 1  |
| 5.2.                                                            | Isolation from samples from non- food-related environments                                                         |                          |   | 13                       |    |

5.B.                    Origin (by country) of articles referring to isolation of the organism from samples from non-food-related environments

|             |   |                   |   |                          |   |
|-------------|---|-------------------|---|--------------------------|---|
| Austria     | 1 | France            | 1 | Greece                   | 1 |
| India       | 1 | Kenya             | 1 | Mexico                   | 1 |
| Nigeria     | 1 | Rep. South Africa | 2 | Spain                    | 1 |
| Switzerland | 1 | United Kingdom    | 1 | United States of America | 1 |

|      |                                 |    |
|------|---------------------------------|----|
| 6.   | Pathogenesis studies            | 17 |
| 6.1. | Studies in mice                 | 9  |
| 5.2. | Studies in sheep                | 2  |
| 5.3. | Studies in cattle               | 1  |
| 5.4. | Studies in rabbit               | 1  |
| 5.5. | Studies in zebrafish            | 1  |
| 5.6. | Studies in material from humans | 5  |
| 7.   | Protection of foods             | 14 |
| 8.   | Various topics                  | 5  |

**Table S2.** Variables evaluated for potential association with isolation of *Listeria monocytogenes* and *Listeria ivanovii* from bulk-tank raw milk of 444 small ruminant farms during a countrywide investigation in Greece.

| <b>Husbandry-related variables (<i>n</i> = 36)</b>                                                  |
|-----------------------------------------------------------------------------------------------------|
| Management system applied in the farm (description according to EFSA classification <sup>1</sup> )  |
| Month into the lactation period at sampling (month)                                                 |
| No. of female animals in the farm (no.)                                                             |
| Presence of cattle or buffaloes in the farm (yes / no)                                              |
| Presence of pigs in the farm (yes / no)                                                             |
| Presence of rabbits in the farm (yes / no)                                                          |
| Presence of poultry in the farm (yes / no)                                                          |
| Presence of dogs in the farm (yes / no)                                                             |
| Presence of cats in the farm (yes / no)                                                             |
| Presence of exotic animals in the farm (yes / no)                                                   |
| Presence of equids in the farm (yes / no)                                                           |
| Presence of rodents in the farm (yes / no)                                                          |
| Grazing of wildlife animals in same areas as animals of the farm (yes / no)                         |
| Machine- or hand-milking (yes / no)                                                                 |
| Temperature of cleaning water in the milking parlour (°C)                                           |
| Use of detergent for parlour cleaning after the milking sessions (yes / no)                         |
| Temperature of milk storage tank (°C)                                                               |
| Total milk quantity per ewe / doe obtained during the preceding milking period (litres)             |
| Start of lambing / kidding period in the farm (all year / autumn / winter / spring or summer)       |
| Preparation of dairy products for home consumption at the farm (yes / no)                           |
| Collaboration with a veterinarian (yes / no)                                                        |
| Total visits made annually by veterinarians to the farm during the preceding season (no. of visits) |
| Application of quarantine in new animals entering into the farm (yes / no)                          |
| Transhumance practiced in the farm (yes / no)                                                       |
| Disinfections performed in the farm (yes / no)                                                      |
| Annual frequency of systemic disinfections in the farm (no.)                                        |
| Daily number of milking sessions (no.)                                                              |
| Use of teat disinfection after milking                                                              |
| Grazing practice (yes / no)                                                                         |
| Grazing land available to animals (acres per animal)                                                |
| Annual duration of grazing (months)                                                                 |
| Availability of straw bedding (yes / no)                                                            |
| Provision of hay as fodder to animals (yes / no)                                                    |
| Average quantity of hay provided daily to animals during the preceding season (kg)                  |
| Provision of silage to adult animals (yes / no)                                                     |

Provision of finished feed (concentrate) to adult animals (yes / no)

---

**Human resources-related variables ( $n = 6$ )**

---

Age of farmer (years)

Length of previous animal farming experience (years)

General education (description)

Farmer by profession (yes / no)

Family tradition in farming (yes / no)

Presence of working staff in the farm (yes/no)

---

**Climate-related variables ( $n = 9$ )**

---

Average precipitation during the 15 days prior to sampling (mm)

Average relative humidity during the 15 days prior to sampling (%)

Average minimum temperature at 2 m during the 15 days prior to sampling (°C)

Average maximum temperature at 2 m during the 15 days prior to sampling (°C)

Average temperature range at 2 m during the 15 days prior to sampling (°C)

Average mean temperature at 2 m during the 15 days prior to sampling (°C)

Average earth skin temperature at 2 m during the 15 days prior to sampling (°C)

Average wind speed at 10 m during the 15 days prior to sampling ( $\text{m s}^{-1}$ )

Average all sky insolation incident during the 15 days prior to sampling ( $\text{Wh m}^{-2}$ )

---

<sup>1</sup> management system classified as intensive, semi-intensive, semi-extensive, extensive (European Food Safety Authority. Scientific opinion on the welfare risks related to the farming of sheep for wool, meat and milk production. *EFSA J.* 2014;12:3933–4060).

**Table S3.** Details of isolation of *Listeria monocytogenes* and *Listeria ivanovii* from bulk-tank milk raw milk of 325 sheep farms during a countrywide investigation in Greece.

| Isolate reference       | Isolation from plates cultured<br>from inoculated half-Fraser broth |                                                      | Isolation from plates cultured<br>from inoculated Fraser broth |                                                      |
|-------------------------|---------------------------------------------------------------------|------------------------------------------------------|----------------------------------------------------------------|------------------------------------------------------|
|                         | Plates with <i>Listeria</i> agar<br>acc. Ottaviani and Agosti       | Plates with PALCAM<br><i>Listeria</i> selective agar | Plates with <i>Listeria</i> agar<br>acc. Ottaviani and Agosti  | Plates with PALCAM<br><i>Listeria</i> selective agar |
| <i>L. monocytogenes</i> |                                                                     |                                                      |                                                                |                                                      |
| NGS02 <sup>1</sup>      | + growth                                                            | ++ growth                                            | + growth                                                       | + growth                                             |
|                         | + growth                                                            | ++ growth                                            | + growth                                                       | + growth                                             |
|                         | + growth                                                            | ++ growth                                            | + growth                                                       | ++ growth                                            |
|                         | + growth                                                            | ++ growth                                            | + growth                                                       | + growth                                             |
| <i>L. ivanovii</i>      |                                                                     |                                                      |                                                                |                                                      |
| NGS01                   | no growth                                                           | no growth                                            | 5 colonies                                                     | 9 colonies                                           |
|                         | no growth                                                           | no growth                                            | 4 colonies                                                     | 10 colonies                                          |
|                         | no growth                                                           | no growth                                            | 5 colonies                                                     | 6 colonies                                           |
|                         | no growth                                                           | no growth                                            | 7 colonies                                                     | 8 colonies                                           |
| NGS03                   | no growth                                                           | + growth                                             | + growth                                                       | + growth                                             |
|                         | no growth                                                           | + growth                                             | + growth                                                       | ++ growth                                            |
|                         | no growth                                                           | + growth                                             | + growth                                                       | ++ growth                                            |
|                         | no growth                                                           | + growth                                             | + growth                                                       | + growth                                             |
| NGS04                   | no growth                                                           | ++ growth                                            | 50 colonies                                                    | ++ growth                                            |
|                         | no growth                                                           | ++ growth                                            | 43 colonies                                                    | ++ growth                                            |
|                         | no growth                                                           | ++ growth                                            | 62 colonies                                                    | ++ growth                                            |
|                         | no growth                                                           | ++ growth                                            | 53 colonies                                                    | ++ growth                                            |

<sup>1</sup> results of the four sub-samples from bulk-tank raw milk are presented for each isolate.

**Table S4.** Details of results of testing (diametres of zones of inhibition) for susceptibility to antibiotics of *Listeria monocytogenes* and *Listeria ivanovii* from bulk-tank milk raw milk of 325 sheep farms during a countrywide investigation in Greece.

| Isolate reference       | Antibiotics used for testing                                                         |                                         |                                     |                                  |                                                           |
|-------------------------|--------------------------------------------------------------------------------------|-----------------------------------------|-------------------------------------|----------------------------------|-----------------------------------------------------------|
|                         | (diametre of inhibition zone for characterisation as sensitive (S) or resistant (R)) |                                         |                                     |                                  |                                                           |
|                         | Ampicillin<br>(S ≥ 16, R < 16 mm <sup>1</sup> )                                      | Benzylpenicillin<br>(S ≥ 13, R < 13 mm) | Erythromycin<br>(S ≥ 25, R < 25 mm) | Meropenem<br>(S ≥ 26, R < 26 mm) | Trimethoprim –<br>sulfamethoxazole<br>(S ≥ 29, R < 29 mm) |
| <i>L. monocytogenes</i> |                                                                                      |                                         |                                     |                                  |                                                           |
| NGS02 <sup>1</sup>      | 20 mm                                                                                | 18 mm                                   | 30 mm                               | 29 mm                            | 33 mm                                                     |
| <i>L. ivanovii</i>      |                                                                                      |                                         |                                     |                                  |                                                           |
| NGS01                   | 21 mm                                                                                | 18 mm                                   | 30 mm                               | 30 mm                            | 34 mm                                                     |
| NGS03                   | 21 mm                                                                                | 18 mm                                   | 30 mm                               | 30 mm                            | 34 mm                                                     |
| NGS04                   | 21 mm                                                                                | 18 mm                                   | 30 mm                               | 30 mm                            | 34 mm                                                     |

<sup>1</sup> S: isolate sensitive, R: isolate resistant.

**Table S5.** Quality parameters of bulk-tank raw milk of 325 sheep farms from which *Listeria monocytogenes* and *Listeria ivanovii* was or was not isolated during a countrywide investigation in Greece.

|                                                                                                                          | Somatic cell counts<br>(cells mL <sup>-1</sup> )                                  | Total bacterial counts<br>(cfu mL <sup>-1</sup> )                             | Fat content<br>(%) | Total protein<br>content (%) |
|--------------------------------------------------------------------------------------------------------------------------|-----------------------------------------------------------------------------------|-------------------------------------------------------------------------------|--------------------|------------------------------|
| Isolation of <i>L. monocytogenes</i> from<br>the bulk-tank raw milk ( <i>n</i> = 1)                                      | 0.690×10 <sup>6</sup>                                                             | 57×10 <sup>3</sup>                                                            | 5.72               | 4.52                         |
| Isolation of <i>L. ivanovii</i> from the<br>bulk-tank raw milk ( <i>n</i> = 3)                                           | 0.339×10 <sup>6</sup><br>(95% CI: 0.218×10 <sup>6</sup> - 0.526×10 <sup>6</sup> ) | 264×10 <sup>3</sup><br>(95% CI: 51×10 <sup>3</sup> - 1349×10 <sup>3</sup> )   | 6.72 ± 0.07        | 4.33 ± 0.09                  |
| No isolation of <i>L. ivanovii</i> or <i>L.</i><br><i>monocytogenes</i> from the bulk-tank<br>raw milk ( <i>n</i> = 321) | 0.486×10 <sup>6</sup><br>(95% CI: 0.448×10 <sup>6</sup> - 0.526×10 <sup>6</sup> ) | 402×10 <sup>3</sup><br>(95% CI: 339×10 <sup>3</sup> - 0.479×10 <sup>3</sup> ) | 6.16 ± 0.05        | 4.43 ± 0.01                  |
| <i>p</i>                                                                                                                 | 0.39                                                                              | 0.66                                                                          | 0.26               | 0.53                         |

**Table S6.** Results of univariable analysis for association of husbandry-related variables with isolation of *Listeria monocytogenes* or *Listeria ivanovii* from bulk-tank raw milk of 325 sheep farms during a countrywide investigation in Greece.

| Isolation of <i>L. monocytogenes</i><br>from the bulk-tank raw milk ( <i>n</i> = 1) |                |                |            | Isolation of <i>L. ivanovii</i><br>from the bulk-tank raw milk ( <i>n</i> = 3) |                |                |            | No isolation of <i>L. ivanovii</i> or <i>L. monocytogenes</i><br>from the bulk-tank raw milk ( <i>n</i> = 321) |                |                |            | <i>p</i> <sup>1</sup> | <i>p</i> <sup>2</sup> |
|-------------------------------------------------------------------------------------|----------------|----------------|------------|--------------------------------------------------------------------------------|----------------|----------------|------------|----------------------------------------------------------------------------------------------------------------|----------------|----------------|------------|-----------------------|-----------------------|
| Management system applied in the flock                                              |                |                |            |                                                                                |                |                |            |                                                                                                                |                |                |            |                       |                       |
| Intensive                                                                           | Semi-intensive | Semi-extensive | Extensive  | Intensive                                                                      | Semi-intensive | Semi-extensive | Extensive  | Intensive                                                                                                      | Semi-intensive | Semi-extensive | Extensive  |                       |                       |
| 0                                                                                   | 1              | 0              | 0          | 0                                                                              | 1              | 2              | 0          | 43                                                                                                             | 149            | 105            | 24         | 0.76                  | 0.62                  |
| Month into the lactation period at sampling                                         |                |                |            |                                                                                |                |                |            |                                                                                                                |                |                |            |                       |                       |
| 0–1st                                                                               | 2nd–5th        | 6th–9th        | After 9th  | 0–1st                                                                          | 2nd–5th        | 6th–9th        | After 9th  | 0–1st                                                                                                          | 2nd–5th        | 6th–9th        | After 9th  |                       |                       |
| 0                                                                                   | 0              | 1              | 0          | 0                                                                              | 0              | 3              | 0          | 23                                                                                                             | 138            | 143            | 17         | 0.75                  | 0.30                  |
| No. of female animals in the farm                                                   |                |                |            |                                                                                |                |                |            |                                                                                                                |                |                |            |                       |                       |
| ≤ 165 ewes                                                                          | 166-330 ewes   | 331-500 ewes   | > 500 ewes | ≤ 165 ewes                                                                     | 166-330 ewes   | 331-500 ewes   | > 500 ewes | ≤ 165 ewes                                                                                                     | 166-330 ewes   | 331-500 ewes   | > 500 ewes |                       |                       |
| 0                                                                                   | 0              | 0              | 1          | 0                                                                              | 0              | 1              | 2          | 88                                                                                                             | 120            | 65             | 48         | 0.15                  | 0.07                  |
| Presence of cattle or buffaloes in the farm                                         |                |                |            |                                                                                |                |                |            |                                                                                                                |                |                |            |                       |                       |
| Yes                                                                                 |                | No             |            | Yes                                                                            |                | No             |            | Yes                                                                                                            |                | No             |            |                       |                       |
| 0                                                                                   |                | 1              |            | 0                                                                              |                | 3              |            | 33                                                                                                             |                | 288            |            | 0.74                  | 0.56                  |
| Presence of pigs in the farm                                                        |                |                |            |                                                                                |                |                |            |                                                                                                                |                |                |            |                       |                       |
| Yes                                                                                 |                | No             |            | Yes                                                                            |                | No             |            | Yes                                                                                                            |                | No             |            |                       |                       |
| 1                                                                                   |                | 0              |            | 2                                                                              |                | 1              |            | 33                                                                                                             |                | 288            |            | 0.005                 | 0.002                 |
| Presence of rabbits in the farm                                                     |                |                |            |                                                                                |                |                |            |                                                                                                                |                |                |            |                       |                       |
| Yes                                                                                 |                | No             |            | Yes                                                                            |                | No             |            | Yes                                                                                                            |                | No             |            |                       |                       |
| 0                                                                                   |                | 1              |            | 0                                                                              |                | 3              |            | 28                                                                                                             |                | 293            |            | 0.76                  | 0.59                  |
| Presence of poultry in the farm                                                     |                |                |            |                                                                                |                |                |            |                                                                                                                |                |                |            |                       |                       |
| Yes                                                                                 |                | No             |            | Yes                                                                            |                | No             |            | Yes                                                                                                            |                | No             |            |                       |                       |
| 0                                                                                   |                | 1              |            | 1                                                                              |                | 2              |            | 180                                                                                                            |                | 141            |            | 0.26                  | 0.43                  |
| Presence of dogs in the farm                                                        |                |                |            |                                                                                |                |                |            |                                                                                                                |                |                |            |                       |                       |
| Yes                                                                                 |                | No             |            | Yes                                                                            |                | No             |            | Yes                                                                                                            |                | No             |            |                       |                       |
| 1                                                                                   |                | 0              |            | 3                                                                              |                | 0              |            | 293                                                                                                            |                | 28             |            | 0.76                  | 0.59                  |
| Presence of cats in the farm                                                        |                |                |            |                                                                                |                |                |            |                                                                                                                |                |                |            |                       |                       |
| Yes                                                                                 |                | No             |            | Yes                                                                            |                | No             |            | Yes                                                                                                            |                | No             |            |                       |                       |
| 1                                                                                   |                | 0              |            | 3                                                                              |                | 0              |            | 167                                                                                                            |                | 154            |            | 0.34                  | 0.10                  |

| Presence of exotic animals in the farm                                   |              |         |                  |                 |              |         |                  |                 |              |         |                  |
|--------------------------------------------------------------------------|--------------|---------|------------------|-----------------|--------------|---------|------------------|-----------------|--------------|---------|------------------|
| Yes                                                                      | No           |         |                  | Yes             | No           |         |                  | Yes             | No           |         |                  |
| 0                                                                        | 1            |         |                  | 0               | 3            |         |                  | 0               | 321          |         |                  |
| n/a                                                                      |              |         |                  |                 |              |         |                  |                 |              |         |                  |
| n/a                                                                      |              |         |                  |                 |              |         |                  |                 |              |         |                  |
| Presence of equids in the farm                                           |              |         |                  |                 |              |         |                  |                 |              |         |                  |
| Yes                                                                      | No           |         |                  | Yes             | No           |         |                  | Yes             | No           |         |                  |
| 0                                                                        | 1            |         |                  | 0               | 3            |         |                  | 57              | 264          |         |                  |
| 0.64                                                                     |              |         |                  |                 |              |         |                  |                 |              |         |                  |
| 0.42                                                                     |              |         |                  |                 |              |         |                  |                 |              |         |                  |
| Presence of rodents in the farm                                          |              |         |                  |                 |              |         |                  |                 |              |         |                  |
| Yes                                                                      | No           |         |                  | Yes             | No           |         |                  | Yes             | No           |         |                  |
| 1                                                                        | 0            |         |                  | 3               | 0            |         |                  | 321             | 0            |         |                  |
| n/a                                                                      |              |         |                  |                 |              |         |                  |                 |              |         |                  |
| n/a                                                                      |              |         |                  |                 |              |         |                  |                 |              |         |                  |
| Grazing of wildlife animals in same areas as animals of the farm         |              |         |                  |                 |              |         |                  |                 |              |         |                  |
| Yes                                                                      | No           |         |                  | Yes             | No           |         |                  | Yes             | No           |         |                  |
| 1                                                                        | 0            |         |                  | 0               | 3            |         |                  | 151             | 170          |         |                  |
| 0.29                                                                     |              |         |                  |                 |              |         |                  |                 |              |         |                  |
| 0.10                                                                     |              |         |                  |                 |              |         |                  |                 |              |         |                  |
| Machine- or hand-milking                                                 |              |         |                  |                 |              |         |                  |                 |              |         |                  |
| Machine-milking                                                          | Hand-milking |         |                  | Machine-milking | Hand-milking |         |                  | Machine-milking | Hand-milking |         |                  |
| 1                                                                        | 0            |         |                  | 3               | 0            |         |                  | 251             | 70           |         |                  |
| 0.60                                                                     |              |         |                  |                 |              |         |                  |                 |              |         |                  |
| 0.36                                                                     |              |         |                  |                 |              |         |                  |                 |              |         |                  |
| Temperature of cleaning water in the milking parlour                     |              |         |                  |                 |              |         |                  |                 |              |         |                  |
| ≤ 75 °C                                                                  | > 75 °C      |         |                  | ≤ 75 °C         | > 75 °C      |         |                  | ≤ 75 °C         | > 75 °C      |         |                  |
| 1                                                                        | 0            |         |                  | 3               | 0            |         |                  | 152             | 99           |         |                  |
| 0.42                                                                     |              |         |                  |                 |              |         |                  |                 |              |         |                  |
| 0.17                                                                     |              |         |                  |                 |              |         |                  |                 |              |         |                  |
| Use of detergent for parlour cleaning after the milking sessions         |              |         |                  |                 |              |         |                  |                 |              |         |                  |
| Yes                                                                      | No           |         |                  | Yes             | No           |         |                  | Yes             | No           |         |                  |
| 1                                                                        | 0            |         |                  | 3               | 0            |         |                  | 248             | 3            |         |                  |
| 0.91                                                                     |              |         |                  |                 |              |         |                  |                 |              |         |                  |
| 0.85                                                                     |              |         |                  |                 |              |         |                  |                 |              |         |                  |
| Temperature of milk storage tank                                         |              |         |                  |                 |              |         |                  |                 |              |         |                  |
| ≤ 4 °C                                                                   | > 4 °C       |         |                  | ≤ 4 °C          | > 4 °C       |         |                  | Yes             | No           |         |                  |
| 1                                                                        | 0            |         |                  | 3               | 0            |         |                  | 231             | 71           |         |                  |
| 0.58                                                                     |              |         |                  |                 |              |         |                  |                 |              |         |                  |
| 0.34                                                                     |              |         |                  |                 |              |         |                  |                 |              |         |                  |
| Total milk quantity per ewe obtained during the preceding milking period |              |         |                  |                 |              |         |                  |                 |              |         |                  |
| ≤ 200 L                                                                  | 201-400 L    | > 400 L |                  | ≤ 200 L         | 201-400 L    | > 400 L |                  | ≤ 200 L         | 201-400 L    | > 400 L |                  |
| 1                                                                        | 0            | 0       |                  | 0               | 3            | 0       |                  | 172             | 134          | 15      |                  |
| 0.64                                                                     |              |         |                  |                 |              |         |                  |                 |              |         |                  |
| 0.13                                                                     |              |         |                  |                 |              |         |                  |                 |              |         |                  |
| Start of lambing period in the farm                                      |              |         |                  |                 |              |         |                  |                 |              |         |                  |
| All year                                                                 | Autumn       | Winter  | Spring or summer | All year        | Autumn       | Winter  | Spring or summer | All year        | Autumn       | Winter  | Spring or summer |
| 0                                                                        | 1            | 0       | 0                | 1               | 2            | 0       | 0                | 17              | 242          | 55      | 7                |
| 0.21                                                                     |              |         |                  |                 |              |         |                  |                 |              |         |                  |
| 0.18                                                                     |              |         |                  |                 |              |         |                  |                 |              |         |                  |
| Preparation of dairy products for home consumption                       |              |         |                  |                 |              |         |                  |                 |              |         |                  |
| Yes                                                                      | No           |         |                  | Yes             | No           |         |                  | Yes             | No           |         |                  |
| 0                                                                        | 1            |         |                  | 1               | 2            |         |                  | 200             | 121          |         |                  |
| 0.20                                                                     |              |         |                  |                 |              |         |                  |                 |              |         |                  |
| 0.31                                                                     |              |         |                  |                 |              |         |                  |                 |              |         |                  |

| Collaboration with a veterinarian                                                   |                                  |                               |                               |                                  |                               |                                 |                                    |                                |                       |                         |                          |      |      |
|-------------------------------------------------------------------------------------|----------------------------------|-------------------------------|-------------------------------|----------------------------------|-------------------------------|---------------------------------|------------------------------------|--------------------------------|-----------------------|-------------------------|--------------------------|------|------|
| Yes<br>1                                                                            | No<br>0                          | Yes<br>3                      | No<br>0                       | Yes<br>273                       | No<br>48                      |                                 |                                    |                                |                       |                         |                          |      |      |
| Total visits made annually by veterinarians to the farm during the preceding season |                                  |                               |                               |                                  |                               |                                 |                                    |                                |                       |                         |                          |      |      |
| ≤ 4<br>1                                                                            | 5 - 7<br>0                       | >7<br>0                       | ≤ 4<br>1                      | 5 - 7<br>1                       | >7<br>1                       | ≤ 4<br>137                      | 5 - 7<br>85                        | > 7<br>99                      |                       |                         |                          |      |      |
| Application of quarantine in new animals entering into the farm                     |                                  |                               |                               |                                  |                               |                                 |                                    |                                |                       |                         |                          |      |      |
| Yes<br>0                                                                            | No<br>1                          | Yes<br>2                      | No<br>1                       | Yes<br>209                       | No<br>112                     |                                 |                                    |                                |                       |                         |                          |      |      |
| Transhumance practiced in the farm                                                  |                                  |                               |                               |                                  |                               |                                 |                                    |                                |                       |                         |                          |      |      |
| Yes<br>0                                                                            | No<br>1                          | Yes<br>1                      | No<br>2                       | Yes<br>48                        | No<br>273                     |                                 |                                    |                                |                       |                         |                          |      |      |
| Disinfections performed in the farm                                                 |                                  |                               |                               |                                  |                               |                                 |                                    |                                |                       |                         |                          |      |      |
| Yes<br>1                                                                            | No<br>0                          | Yes<br>3                      | No<br>0                       | Yes<br>293                       | No<br>28                      |                                 |                                    |                                |                       |                         |                          |      |      |
| Annual frequency of systemic disinfections in the farm                              |                                  |                               |                               |                                  |                               |                                 |                                    |                                |                       |                         |                          |      |      |
| 0 – 1 occasion<br>0                                                                 | 2 – 10 occasions<br>1            | > 10 occasions<br>0           | 0 – 1 occasion<br>0           | 2 – 10 occasions<br>3            | > 10 occasions<br>0           | 0 – 1 occasion<br>79            | 2 – 10 occasions<br>224            | > 10 occasions<br>18           |                       |                         |                          |      |      |
| Daily number of milking sessions                                                    |                                  |                               |                               |                                  |                               |                                 |                                    |                                |                       |                         |                          |      |      |
| 1<br>0                                                                              | 2<br>1                           | 3<br>0                        | 1<br>0                        | 2<br>3                           | 3<br>0                        | 1<br>1                          | 2<br>260                           | 3<br>60                        |                       |                         |                          |      |      |
| Use of teat disinfection after milking                                              |                                  |                               |                               |                                  |                               |                                 |                                    |                                |                       |                         |                          |      |      |
| Yes<br>0                                                                            | No<br>1                          | Yes<br>0                      | No<br>3                       | Yes<br>52                        | No<br>269                     |                                 |                                    |                                |                       |                         |                          |      |      |
| Grazing practiced                                                                   |                                  |                               |                               |                                  |                               |                                 |                                    |                                |                       |                         |                          |      |      |
| Yes<br>1                                                                            | No<br>0                          | Yes<br>3                      | No<br>0                       | Yes<br>279                       | No<br>42                      |                                 |                                    |                                |                       |                         |                          |      |      |
| Grazing land available to animals                                                   |                                  |                               |                               |                                  |                               |                                 |                                    |                                |                       |                         |                          |      |      |
| ≤ 0.50 ac.<br>per animal<br>0                                                       | 0.51-2.00 ac.<br>per animal<br>1 | > 2.00 ac.<br>per animal<br>0 | ≤ 0.50 ac.<br>per animal<br>3 | 0.51-2.00 ac.<br>per animal<br>0 | > 2.00 ac.<br>per animal<br>0 | ≤ 0.50 ac.<br>per animal<br>125 | 0.51-2.00 ac.<br>per animal<br>150 | > 2.00 ac.<br>per animal<br>46 |                       |                         |                          |      |      |
| Annual duration of grazing                                                          |                                  |                               |                               |                                  |                               |                                 |                                    |                                |                       |                         |                          |      |      |
| 0<br>months<br>0                                                                    | 1 - 5<br>months<br>0             | 6 - 10<br>months<br>1         | 11 – 12<br>months<br>0        | 0<br>months<br>0                 | 1 - 5<br>months<br>0          | 6 - 10<br>months<br>2           | 11 – 12<br>months<br>1             | 0<br>months<br>44              | 1 - 5<br>months<br>46 | 6 - 10<br>months<br>121 | 11 – 12<br>months<br>110 | 0.65 | 0.69 |

| Availability of straw bedding                                                 |          |          |          |          |          |      |      |
|-------------------------------------------------------------------------------|----------|----------|----------|----------|----------|------|------|
| Yes                                                                           | No       | Yes      | No       | Yes      | No       |      |      |
| 1                                                                             | 0        | 2        | 1        | 265      | 56       | 0.64 | 0.47 |
| Provision of hay as fodder to animals                                         |          |          |          |          |          |      |      |
| Yes                                                                           | No       | Yes      | No       | Yes      | No       |      |      |
| 1                                                                             | 0        | 3        | 0        | 320      | 1        | 0.96 | 0.92 |
| Average quantity of hay provided daily to animals during the preceding season |          |          |          |          |          |      |      |
| ≤ 0.6 kg                                                                      | > 0.6 kg | ≤ 0.6 kg | > 0.6 kg | ≤ 0.6 kg | > 0.6 kg |      |      |
| 1                                                                             | 0        | 2        | 1        | 106      | 215      | 0.16 | 0.22 |
| Provision of silage to adult animals                                          |          |          |          |          |          |      |      |
| Yes                                                                           | No       | Yes      | No       | Yes      | No       |      |      |
| 0                                                                             | 1        | 1        | 2        | 71       | 250      | 0.59 | 0.64 |
| Provision of finished feed (concentrate) to adult animals                     |          |          |          |          |          |      |      |
| Yes                                                                           | No       | Yes      | No       | Yes      | No       |      |      |
| 1                                                                             | 0        | 3        | 0        | 317      | 4        | 0.91 | 0.85 |

<sup>1</sup> *p* for associations with isolation of *L. monocytogenes* versus no isolation of this organism.

<sup>2</sup> *p* for associations with isolation of *L. ivanovi* versus no isolation of this organism.

**Table S7.** Results of univariable analysis for association of human resources-related variables with isolation of *Listeria monocytogenes* or *Listeria ivanovii* from bulk-tank raw milk of 325 sheep farms during a countrywide investigation in Greece.

| Isolation of <i>L. monocytogenes</i><br>from the bulk-tank raw milk ( <i>n</i> = 1) |                                |          | Isolation of <i>L. ivanovii</i><br>from the bulk-tank raw milk ( <i>n</i> = 3) |                                |          | No isolation of <i>L. ivanovii</i> or <i>L. monocytogenes</i><br>from the bulk-tank raw milk ( <i>n</i> = 321) |                                |          | <i>p</i> <sup>1</sup> | <i>p</i> <sup>2</sup> |
|-------------------------------------------------------------------------------------|--------------------------------|----------|--------------------------------------------------------------------------------|--------------------------------|----------|----------------------------------------------------------------------------------------------------------------|--------------------------------|----------|-----------------------|-----------------------|
| Age of the farmer                                                                   |                                |          |                                                                                |                                |          |                                                                                                                |                                |          |                       |                       |
| Up to 50 years                                                                      | Over 50 years                  |          | Up to 50 years                                                                 | Over 50 years                  |          | Up to 50 years                                                                                                 | Over 50 years                  |          |                       |                       |
| 0                                                                                   | 1                              |          | 2                                                                              | 1                              |          | 195                                                                                                            | 126                            |          | 0.21                  | 0.83                  |
| Length of previous farming experience                                               |                                |          |                                                                                |                                |          |                                                                                                                |                                |          |                       |                       |
| ≤ 5 years                                                                           | > 5 years                      |          | ≤ 5 years                                                                      | > 5 years                      |          | ≤ 5 years                                                                                                      | > 5 years                      |          |                       |                       |
| 0                                                                                   | 1                              |          | 2                                                                              | 1                              |          | 72                                                                                                             | 249                            |          | 0.57                  | 0.07                  |
| Education of the farmer                                                             |                                |          |                                                                                |                                |          |                                                                                                                |                                |          |                       |                       |
| Primary                                                                             | Secondary or<br>post-secondary | Tertiary | Primary                                                                        | Secondary or<br>post-secondary | Tertiary | Primary                                                                                                        | Secondary or<br>post-secondary | Tertiary |                       |                       |
| 0                                                                                   | 1                              | 0        | 0                                                                              | 2                              | 1        | 57                                                                                                             | 222                            | 42       | 0.80                  | 0.56                  |
| Farmer by profession                                                                |                                |          |                                                                                |                                |          |                                                                                                                |                                |          |                       |                       |
| Yes                                                                                 | No                             |          | Yes                                                                            | No                             |          | Yes                                                                                                            | No                             |          |                       |                       |
| 1                                                                                   | 0                              |          | 3                                                                              | 0                              |          | 288                                                                                                            | 33                             |          | 0.74                  | 0.56                  |
| Family tradition in farming                                                         |                                |          |                                                                                |                                |          |                                                                                                                |                                |          |                       |                       |
| Yes                                                                                 | No                             |          | Yes                                                                            | No                             |          | Yes                                                                                                            | No                             |          |                       |                       |
| 1                                                                                   | 0                              |          | 2                                                                              | 1                              |          | 280                                                                                                            | 41                             |          | 0.70                  | 0.30                  |
| Presence of working staff in the flock                                              |                                |          |                                                                                |                                |          |                                                                                                                |                                |          |                       |                       |
| Yes                                                                                 | No                             |          | Yes                                                                            | No                             |          | Yes                                                                                                            | No                             |          |                       |                       |
| 1                                                                                   | 0                              |          | 2                                                                              | 1                              |          | 120                                                                                                            | 201                            |          | 0.20                  | 0.30                  |

<sup>1</sup> *p* for associations with isolation of *L. monocytogenes* versus no isolation of this organism.

<sup>2</sup> *p* for associations with isolation of *L. ivanovi* versus no isolation of this organism.

**Table S8.** Results of univariable analysis for association of climate-related variables with isolation of *Listeria monocytogenes* or *Listeria ivanovii* from bulk-tank raw milk of 325 sheep farms during a countrywide investigation in Greece.

| Isolation of <i>L. monocytogenes</i><br>from the bulk-tank raw milk ( <i>n</i> = 1) | Isolation of <i>L. ivanovii</i><br>from the bulk-tank raw milk ( <i>n</i> = 3) | No isolation of <i>L. ivanovii</i> or <i>L. monocytogenes</i><br>from the bulk-tank raw milk ( <i>n</i> = 321) | <i>p</i> <sup>1</sup> | <i>p</i> <sup>2</sup> |
|-------------------------------------------------------------------------------------|--------------------------------------------------------------------------------|----------------------------------------------------------------------------------------------------------------|-----------------------|-----------------------|
| 24.3 °C                                                                             | Average mean temperature at 2 m<br>14.1 °C ± 6.7 °C                            | 14.1 °C ± 0.4 °C                                                                                               | n/a                   | 0.98                  |
| 25.2 °C                                                                             | Average earth skin temperature<br>13.8 °C ± 7.3 °C                             | 14.1 °C ± 0.4 °C                                                                                               | n/a                   | 0.93                  |
| 18.2 °C                                                                             | Average minimum temperature at 2 m<br>9.7 °C ± 6.6 °C                          | 10.2 °C ± 0.4 °C                                                                                               | n/a                   | 0.91                  |
| 30.1 °C                                                                             | Average maximum temperature at 2 m<br>19.1 °C ± 6.4 °C                         | 18.8 °C ± 0.4 °C                                                                                               | n/a                   | 0.96                  |
| 12.07 °C                                                                            | Average temperature range at 2 m<br>9.4 °C ± 1.4 °C                            | 8.7 °C ± 0.1 °C                                                                                                | n/a                   | 0.61                  |
| 1.01 mm                                                                             | Average precipitation<br>0.65 ± 0.35 mm                                        | 1.70 ± 0.08 mm                                                                                                 | n/a                   | 0.20                  |
| 53.2%                                                                               | Average relative humidity at 2 m<br>62.2% ± 2.6%                               | 71.9% ± 0.5%                                                                                                   | n/a                   | 0.08                  |
| 1.4 m s <sup>-1</sup>                                                               | Average wind speed at 10 m<br>2.2 ± 0.5 m s <sup>-1</sup>                      | 2.5 ± 0.1 m s <sup>-1</sup>                                                                                    | n/a                   | 0.68                  |
| 25.2 Wh m <sup>-2</sup>                                                             | Average all sky insolation incident<br>18.4 ± 5.4 Wh m <sup>-2</sup>           | 15.8 ± 0.4 Wh m <sup>-2</sup>                                                                                  | n/a                   | 0.57                  |

<sup>1</sup> *p* for associations with isolation of *L. monocytogenes* versus no isolation of this organism.

<sup>2</sup> *p* for associations with isolation of *L. ivanovi* versus no isolation of this organism.

**Table S9.** Metrics of the assembled genome of three *L. ivanovii* isolates from bulk-tank raw milk of sheep in Greece.

| Assembly                        | Isolate Reference |         |         |
|---------------------------------|-------------------|---------|---------|
|                                 | NGS01             | NGS03   | NGS04   |
| # contigs ( $\geq 0$ bp)        | 22                | 29      | 23      |
| # contigs ( $\geq 1000$ bp)     | 15                | 16      | 16      |
| # contigs ( $\geq 5000$ bp)     | 12                | 13      | 12      |
| # contigs ( $\geq 10000$ bp)    | 11                | 12      | 11      |
| # contigs ( $\geq 25000$ bp)    | 10                | 11      | 10      |
| # contigs ( $\geq 50000$ bp)    | 10                | 11      | 10      |
| Total length ( $\geq 0$ bp)     | 2902994           | 2907867 | 2900133 |
| Total length ( $\geq 1000$ bp)  | 2898774           | 2899647 | 2896587 |
| Total length ( $\geq 5000$ bp)  | 2892401           | 2893274 | 2888936 |
| Total length ( $\geq 10000$ bp) | 2883946           | 2884819 | 2880481 |
| Total length ( $\geq 25000$ bp) | 2868943           | 2869769 | 2865426 |
| Total length ( $\geq 50000$ bp) | 2868943           | 2869769 | 2865426 |
| # contigs                       | 20                | 26      | 20      |
| Largest contig                  | 783016            | 782973  | 782978  |
| Total length                    | 2902270           | 2906795 | 2899161 |
| GC (%)                          | 37.02             | 37.02   | 37.02   |
| N50                             | 462177            | 462172  | 462178  |
| N75                             | 224675            | 224840  | 224683  |
| L50                             | 3                 | 3       | 3       |
| L75                             | 5                 | 5       | 5       |
| # N's per 100 kbp               | 0.00              | 0.00    | 0.00    |
| Average coverage (%)            | 75×               | 80×     | 105×    |
| CDS                             | 2890              | 2882    | 2856    |
| tRNA                            | 61                | 61      | 61      |
| tmRNA                           | 1                 | 1       | 1       |
| rRNA                            | 7                 | 7       | 7       |

**Table S10.** Summary findings of assessment of genomes, by using the tool PHASTER, of three *Listeria ivanovii* isolates obtained from bulk-tank raw milk of sheep in Greece, for the presence of prophages.

| Assembly                      | NGS01                                            | NGS03                                            | NGS04                                            |
|-------------------------------|--------------------------------------------------|--------------------------------------------------|--------------------------------------------------|
| REGION                        | 1                                                | 1                                                | 1                                                |
| REGION_LENGTH                 | 27.5Kb                                           | 27.5Kb                                           | 27.5Kb                                           |
| COMPLETENESS (score)          | incomplete(30)                                   | incomplete(30)                                   | incomplete(30)                                   |
| SPECIFIC_KEYWORD              | portal, integrase                                | portal, integrase                                | portal, integrase                                |
| REGION_POSITION               | NODE_2_length_538063_cov_31.136098:346740-374288 | NODE_2_length_538087_cov_32.041520:346745-374294 | NODE_2_length_538098_cov_42.442197:346769-374317 |
| TRNA_NUM                      | 0                                                | 0                                                | 0                                                |
| TOTAL_PROTEIN_NUM             | 16                                               | 16                                               | 16                                               |
| PHAGE_HIT_PROTEIN_NUM         | 8                                                | 8                                                | 8                                                |
| HYPOTHETICAL_PROTEIN_NUM      | 8                                                | 8                                                | 8                                                |
| PHAGE+HYPO_PROTEIN_PERCENTAGE | 100%                                             | 100%                                             | 100%                                             |
| BACTERIAL_PROTEIN_NUM         | 0                                                | 0                                                | 0                                                |
| ATT_SITE_SHOWUP               | yes                                              | yes                                              | yes                                              |
| PHAGE_SPECIES_NUM             | 7                                                | 7                                                | 7                                                |

|                                          |                                                                                                                                                                                                                                                                                                                                                                                                                                                                                                                                                                                                                                                                                                                     |                                                                                                                                                                                                                                                                                                                                                                                                                                                                                                                                                                                                                                                                                                                                                                                                                                                                                                                                                                                                                                                                               |                                                                                                                                                                                                                                                                                                                                                                                                                                                                                                                                                                                                                                                                                                                                                                                                                                                                                                                                                                                                                                                                               |
|------------------------------------------|---------------------------------------------------------------------------------------------------------------------------------------------------------------------------------------------------------------------------------------------------------------------------------------------------------------------------------------------------------------------------------------------------------------------------------------------------------------------------------------------------------------------------------------------------------------------------------------------------------------------------------------------------------------------------------------------------------------------|-------------------------------------------------------------------------------------------------------------------------------------------------------------------------------------------------------------------------------------------------------------------------------------------------------------------------------------------------------------------------------------------------------------------------------------------------------------------------------------------------------------------------------------------------------------------------------------------------------------------------------------------------------------------------------------------------------------------------------------------------------------------------------------------------------------------------------------------------------------------------------------------------------------------------------------------------------------------------------------------------------------------------------------------------------------------------------|-------------------------------------------------------------------------------------------------------------------------------------------------------------------------------------------------------------------------------------------------------------------------------------------------------------------------------------------------------------------------------------------------------------------------------------------------------------------------------------------------------------------------------------------------------------------------------------------------------------------------------------------------------------------------------------------------------------------------------------------------------------------------------------------------------------------------------------------------------------------------------------------------------------------------------------------------------------------------------------------------------------------------------------------------------------------------------|
| MOST_COMMON_PHAGE_NAME (hit_genes_count) | PHAGE_Bacill_G_NC_023719(2),PHAGE_Lactob_Iacchus_NC_048084(2),PHAGE_Bacill_SPbeta_NC_001884(2),PHAGE_Lactob_Bromius_NC_048085(2),PHAGE_Lactob_Lpa804_NC_048134(2),PHAGE_Lactob_Bacchae_NC_047924(2),PHAGE_Paenib_PBL1c_NC_048689(1),PHAGE_Paenib_Xenia_NC_028837(1),PHAGE_Paenib_Shelly_NC_041909(1),PHAGE_Bacill_Staley_NC_022767(1),PHAGE_Brevib_Jenst_NC_028805(1),PHAGE_Mycoba_Charlie_NC_023729(1),PHAGE_Lactob_LpeD_NC_048677(1),PHAGE_Lactob_Semele_NC_047926(1),PHAGE_Bacter_Diva_NC_028788(1),PHAGE_Bacill_Mgbh1_NC_041879(1),PHAGE_Bacill_Stills_NC_028777(1),PHAGE_Cronob_ENT39118_NC_019934(1),PHAGE_Bacter_Sitara_NC_028854(1),PHAGE_Salmon_vB_SosS_Oslo_NC_018279(1),PHAGE_Plankt_PaV_LD_NC_016564(1) | PHAGE_Bacill_G_NC_023719(2),PHAGE_Lactob_Bromius_NC_048085(2),PHAGE_Lactob_Bacchae_NC_047924(2),PHAGE_Bacill_SPbeta_NC_001884(2),PHAGE_Lactob_Bacchae_NC_047924(2),PHAGE_Lactob_Bromius_NC_048085(2),PHAGE_Lactob_Iacchus_NC_048084(2),PHAGE_Lactob_Lpa804_NC_048134(2),PHAGE_Bacill_Mgbh1_NC_041879(1),PHAGE_Plankt_PaV_LD_NC_016564(1),PHAGE_Brevib_Jenst_NC_028805(1),PHAGE_Lactob_Semele_NC_047926(1),PHAGE_Bacter_Sitara_NC_028805(1),PHAGE_Paenib_Shelly_NC_041909(1),PHAGE_Bacill_Staley_NC_022767(1),PHAGE_Cronob_ENT39118_NC_019934(1),PHAGE_Bacill_S_Xenia_NC_028837(1),PHAGE_Bacill_Stills_NC_028777(1),PHAGE_Mycoba_Charlie_NC_028777(1),PHAGE_Cronob_ENT39118_NC_019934(1),PHAGE_Paenib_Xenia_NC_028837(1),PHAGE_Paenib_PBL1c_NC_048689(1),PHAGE_Lactob_LpeD_NC_048677(1),PHAGE_Bacter_Diva_NC_028788(1),PHAGE_Mycoba_Bacter_Sitara_NC_028854(1),PHAGE_Lactob_Semele_NC_047926(1),PHAGE_Bacter_Diva_NC_028788(1),PHAGE_Salmon_vB_SosS_Oslo_NC_018279(1),PHAGE_Paenib_Shelly_NC_041909(1),PHAGE_Plankt_PaV_LD_NC_016564(1),PHAGE_Salmon_vB_SosS_Oslo_NC_018279(1) | PHAGE_Bacill_G_NC_023719(2),PHAGE_Lactob_Bromius_NC_048085(2),PHAGE_Lactob_Bacchae_NC_047924(2),PHAGE_Bacill_SPbeta_NC_001884(2),PHAGE_Lactob_Bacchae_NC_047924(2),PHAGE_Lactob_Bromius_NC_048085(2),PHAGE_Lactob_Iacchus_NC_048084(2),PHAGE_Lactob_Lpa804_NC_048134(2),PHAGE_Bacill_Mgbh1_NC_041879(1),PHAGE_Plankt_PaV_LD_NC_016564(1),PHAGE_Brevib_Jenst_NC_028805(1),PHAGE_Lactob_Semele_NC_047926(1),PHAGE_Bacter_Sitara_NC_028805(1),PHAGE_Paenib_Shelly_NC_041909(1),PHAGE_Bacill_Staley_NC_022767(1),PHAGE_Cronob_ENT39118_NC_019934(1),PHAGE_Bacill_S_Xenia_NC_028837(1),PHAGE_Bacill_Stills_NC_028777(1),PHAGE_Mycoba_Charlie_NC_028777(1),PHAGE_Cronob_ENT39118_NC_019934(1),PHAGE_Paenib_Xenia_NC_028837(1),PHAGE_Paenib_PBL1c_NC_048689(1),PHAGE_Lactob_LpeD_NC_048677(1),PHAGE_Bacter_Diva_NC_028788(1),PHAGE_Mycoba_Bacter_Sitara_NC_028854(1),PHAGE_Lactob_Semele_NC_047926(1),PHAGE_Bacter_Diva_NC_028788(1),PHAGE_Salmon_vB_SosS_Oslo_NC_018279(1),PHAGE_Paenib_Shelly_NC_041909(1),PHAGE_Plankt_PaV_LD_NC_016564(1),PHAGE_Salmon_vB_SosS_Oslo_NC_018279(1) |
| FIRST_MOST_COMMON_PHAGE_NUM              | 2                                                                                                                                                                                                                                                                                                                                                                                                                                                                                                                                                                                                                                                                                                                   | 2                                                                                                                                                                                                                                                                                                                                                                                                                                                                                                                                                                                                                                                                                                                                                                                                                                                                                                                                                                                                                                                                             | 2                                                                                                                                                                                                                                                                                                                                                                                                                                                                                                                                                                                                                                                                                                                                                                                                                                                                                                                                                                                                                                                                             |
| FIRST_MOST_COMMON_PHAGE_PERCENTAGE       | 12.5%                                                                                                                                                                                                                                                                                                                                                                                                                                                                                                                                                                                                                                                                                                               | 12.5%                                                                                                                                                                                                                                                                                                                                                                                                                                                                                                                                                                                                                                                                                                                                                                                                                                                                                                                                                                                                                                                                         | 12.5%                                                                                                                                                                                                                                                                                                                                                                                                                                                                                                                                                                                                                                                                                                                                                                                                                                                                                                                                                                                                                                                                         |
| GC_PERCENTAGE                            | 36.51%                                                                                                                                                                                                                                                                                                                                                                                                                                                                                                                                                                                                                                                                                                              | 36.51%                                                                                                                                                                                                                                                                                                                                                                                                                                                                                                                                                                                                                                                                                                                                                                                                                                                                                                                                                                                                                                                                        | 36.50%                                                                                                                                                                                                                                                                                                                                                                                                                                                                                                                                                                                                                                                                                                                                                                                                                                                                                                                                                                                                                                                                        |

**Table S11.** Virulence factor genes detected, by using the tool VirulenceFinder 2.0, in the genome of three *Listeria ivanovii* isolates obtained from bulk-tank raw milk of sheep in Greece.

| (a) Isolate NGS01 |                       |          |                         |                                    |                    |                  |
|-------------------|-----------------------|----------|-------------------------|------------------------------------|--------------------|------------------|
| Data-base         | Virulence factor gene | Identity | Query / Template length | Contig                             | Position in contig | Accession number |
| listeria          | <i>flaA</i>           | 96.06    | 864 / 864               | NODE_1_length_783016_cov_31.348182 | 264028..264891     | NC_003210.1      |
| listeria          | <i>lap</i>            | 93.35    | 2601 / 2601             | NODE_9_length_87297_cov_31.925961  | 17301..19901       | NC_003210.1      |
| listeria          | <i>oppA</i>           | 94.17    | 1680 / 1677             | NODE_2_length_538063_cov_31.136098 | 101617..103296     | NC_003210.1      |
| listeria          | <i>rli55</i>          | 94.04    | 285 / 283               | NODE_1_length_783016_cov_31.348182 | 739492..739774     | NC_003210.1      |
| listeria          | <i>rli60</i>          | 90.27    | 185 / 185               | NODE_2_length_538063_cov_31.136098 | 344374..344557     | NC_003210.1      |
| listeria          | <i>rsbv</i>           | 90.72    | 345 / 345               | NODE_1_length_783016_cov_31.348182 | 480151..480495     | NC_003210.1      |
| listeria          | <i>clpp</i>           | 91.12    | 597 / 597               | NODE_5_length_224675_cov_32.031583 | 126595..127191     | NC_003210.1      |
| listeria          | <i>degU</i>           | 90.25    | 687 / 687               | NODE_5_length_224675_cov_32.031583 | 73998..74684       | NC_003210.1      |
| listeria          | <i>fri</i>            | 92.08    | 467 / 471               | NODE_1_length_783016_cov_31.348182 | 530447..530913     | NC_003210.1      |
| listeria          | <i>hfq</i>            | 93.59    | 234 / 234               | NODE_3_length_462177_cov_28.360333 | 104637..104870     | NC_003210.1      |
| listeria          | <i>inlC</i>           | 92.98    | 869 / 891               | NODE_8_length_89443_cov_32.713814  | 1853..2721         | NC_003210.1      |
| listeria          | <i>lhrC</i>           | 90.09    | 111 / 111               | NODE_8_length_89443_cov_32.713814  | 84134..84243       | NC_003210.1      |
| listeria          | <i>lhrC</i>           | 99.1     | 111 / 111               | NODE_1_length_783016_cov_31.348182 | 533015..533125     | NC_003210.1      |
| listeria          | <i>lsp</i>            | 93.76    | 465 / 465               | NODE_2_length_538063_cov_31.136098 | 488439..488903     | NC_003210.1      |
| listeria          | <i>tcsA</i>           | 95.62    | 1074 / 1074             | NODE_3_length_462177_cov_28.360333 | 195054..196127     | NC_003210.1      |
| listeria          | <i>tig</i>            | 92.76    | 1284 / 1284             | NODE_3_length_462177_cov_28.360333 | 75600..76883       | NC_003210.1      |
| (b) Isolate NGS03 |                       |          |                         |                                    |                    |                  |
| Data-base         | Virulence factor gene | Identity | Query / Template length | Contig                             | Position in contig | Accession number |
| listeria          | <i>flaA</i>           | 96.06    | 864 / 864               | NODE_1_length_782973_cov_32.715747 | 518128..518991     | NC_003210.1      |
| listeria          | <i>lap</i>            | 93.35    | 2601 / 2601             | NODE_10_length_87296_cov_32.180947 | 67396..69996       | NC_003210.1      |
| listeria          | <i>oppA</i>           | 94.17    | 1680 / 1677             | NODE_2_length_538087_cov_32.041520 | 101619..103298     | NC_003210.1      |
| listeria          | <i>rli55</i>          | 94.04    | 285 / 283               | NODE_1_length_782973_cov_32.715747 | 43240..43522       | NC_003210.1      |
| listeria          | <i>rli60</i>          | 90.27    | 185 / 185               | NODE_2_length_538087_cov_32.041520 | 344379..344562     | NC_003210.1      |
| listeria          | <i>rsbv</i>           | 90.72    | 345 / 345               | NODE_1_length_782973_cov_32.715747 | 302529..302873     | NC_003210.1      |
| listeria          | <i>clpp</i>           | 91.12    | 597 / 597               | NODE_5_length_224840_cov_33.193500 | 126592..127188     | NC_003210.1      |
| listeria          | <i>degU</i>           | 90.25    | 687 / 687               | NODE_5_length_224840_cov_33.193500 | 73996..74682       | NC_003210.1      |
| listeria          | <i>fri</i>            | 92.08    | 467 / 471               | NODE_1_length_782973_cov_32.715747 | 252099..252565     | NC_003210.1      |
| listeria          | <i>hfq</i>            | 93.59    | 234 / 234               | NODE_3_length_462172_cov_30.204019 | 104632..104865     | NC_003210.1      |
| listeria          | <i>inlC</i>           | 92.87    | 869 / 891               | NODE_5_length_224840_cov_33.193500 | 1853..2721         | NC_003210.1      |
| listeria          | <i>lhrC</i>           | 99.1     | 111 / 111               | NODE_1_length_782973_cov_32.715747 | 249887..249997     | NC_003210.1      |
| listeria          | <i>lhrC</i>           | 91.96    | 112 / 111               | NODE_9_length_89642_cov_33.152600  | 5404..5514         | NC_003210.1      |

|                 |             |       |             |                                    |                |             |
|-----------------|-------------|-------|-------------|------------------------------------|----------------|-------------|
| <i>listeria</i> | <i>lsp</i>  | 93.76 | 465 / 465   | NODE_2_length_538087_cov_32.041520 | 488450..488914 | NC_003210.1 |
| <i>listeria</i> | <i>tcsA</i> | 95.62 | 1074 / 1074 | NODE_3_length_462172_cov_30.204019 | 195050..196123 | NC_003210.1 |
| <i>listeria</i> | <i>tig</i>  | 92.76 | 1284 / 1284 | NODE_3_length_462172_cov_30.204019 | 75595..76878   | NC_003210.1 |

(c) Isolate NGS04

| Data-base       | Virulence factor gene | Identity | Query / Template length | Contig                             | Position in contig | Accession number |
|-----------------|-----------------------|----------|-------------------------|------------------------------------|--------------------|------------------|
| <i>listeria</i> | <i>flaA</i>           | 96.06    | 864 / 864               | NODE_1_length_782978_cov_43.621160 | 518130..518993     | NC_003210.1      |
| <i>listeria</i> | <i>lap</i>            | 93.35    | 2601 / 2601             | NODE_9_length_87299_cov_44.829854  | 17301..19901       | NC_003210.1      |
| <i>listeria</i> | <i>oppA</i>           | 94.17    | 1680 / 1677             | NODE_2_length_538098_cov_42.442197 | 101633..103312     | NC_003210.1      |
| <i>listeria</i> | <i>rli55</i>          | 94.04    | 285 / 283               | NODE_1_length_782978_cov_43.621160 | 43243..43525       | NC_003210.1      |
| <i>listeria</i> | <i>rli60</i>          | 90.27    | 185 / 185               | NODE_2_length_538098_cov_42.442197 | 344403..344586     | NC_003210.1      |
| <i>listeria</i> | <i>rsbv</i>           | 90.72    | 345 / 345               | NODE_1_length_782978_cov_43.621160 | 302524..302868     | NC_003210.1      |
| <i>listeria</i> | <i>clpp</i>           | 91.12    | 597 / 597               | NODE_5_length_224683_cov_43.244767 | 97491..98087       | NC_003210.1      |
| <i>listeria</i> | <i>degU</i>           | 90.25    | 687 / 687               | NODE_5_length_224683_cov_43.244767 | 150001..150687     | NC_003210.1      |
| <i>listeria</i> | <i>fri</i>            | 92.08    | 467 / 471               | NODE_1_length_782978_cov_43.621160 | 252105..252571     | NC_003210.1      |
| <i>listeria</i> | <i>hfq</i>            | 93.59    | 234 / 234               | NODE_3_length_462178_cov_42.292641 | 357310..357543     | NC_003210.1      |
| <i>listeria</i> | <i>inlC</i>           | 92.98    | 869 / 891               | NODE_5_length_224683_cov_43.244767 | 221963..222831     | NC_003210.1      |
| <i>listeria</i> | <i>lhrC</i>           | 91.96    | 112 / 111               | NODE_8_length_89649_cov_44.258652  | 5405..5515         | NC_003210.1      |
| <i>listeria</i> | <i>lhrC</i>           | 99.1     | 111 / 111               | NODE_1_length_782978_cov_43.621160 | 249893..250003     | NC_003210.1      |
| <i>listeria</i> | <i>lsp</i>            | 93.76    | 465 / 465               | NODE_2_length_538098_cov_42.442197 | 488475..488939     | NC_003210.1      |
| <i>listeria</i> | <i>tcsA</i>           | 95.62    | 1074 / 1074             | NODE_3_length_462178_cov_42.292641 | 266050..267123     | NC_003210.1      |
| <i>listeria</i> | <i>tig</i>            | 92.76    | 1284 / 1284             | NODE_3_length_462178_cov_42.292641 | 385297..386580     | NC_003210.1      |

**Table S12.** Proteins encoded by the virulence factor genes (in alphabetical order) detected in the genome of three *Listeria ivanovii* isolates obtained from bulk-tank raw milk of sheep in Greece.

| Virulence factor gene | Protein encoded                                           | Proposed function                                                                                                                                                                                                                                                                                                                                                                                                                                                                                                                                                                                                                                                                                                                                                                                                                                                                                          | Bacterial species in which studied |
|-----------------------|-----------------------------------------------------------|------------------------------------------------------------------------------------------------------------------------------------------------------------------------------------------------------------------------------------------------------------------------------------------------------------------------------------------------------------------------------------------------------------------------------------------------------------------------------------------------------------------------------------------------------------------------------------------------------------------------------------------------------------------------------------------------------------------------------------------------------------------------------------------------------------------------------------------------------------------------------------------------------------|------------------------------------|
| <i>clpp</i>           | ATP-dependent Clp endopeptidase proteolytic subunit ClpP  | Peptide cleaver in various proteins in processes requiring ATP hydrolysis; chymotrypsin-like activity; degradation of misfolded proteins                                                                                                                                                                                                                                                                                                                                                                                                                                                                                                                                                                                                                                                                                                                                                                   | <i>L. ivanovii</i>                 |
| <i>degU</i>           | Two-component system response regulator DegU              | DNA binding                                                                                                                                                                                                                                                                                                                                                                                                                                                                                                                                                                                                                                                                                                                                                                                                                                                                                                | <i>L. ivanovii</i>                 |
| <i>flaA</i>           | Flagellin A                                               | Polymerization to forming the filaments of bacterial flagella                                                                                                                                                                                                                                                                                                                                                                                                                                                                                                                                                                                                                                                                                                                                                                                                                                              | <i>L. ivanovii</i>                 |
| <i>fri</i>            | Non-heme iron-binding ferritin Fri                        | Ferric iron binding; oxidoreductase activity acting on metal ions                                                                                                                                                                                                                                                                                                                                                                                                                                                                                                                                                                                                                                                                                                                                                                                                                                          | <i>L. ivanovii</i>                 |
| <i>hfq</i>            | RNA chaperone Hfq                                         | RNA chaperone binding small regulatory RNA (sRNAs) and mRNAs to facilitate mRNA translational regulation in response to stressing factors; binding with high specificity to tRNAs                                                                                                                                                                                                                                                                                                                                                                                                                                                                                                                                                                                                                                                                                                                          | <i>L. ivanovii</i>                 |
| <i>inlC</i>           | Internalin C                                              | Virulence enhancer, impairing translocation of host transcription factor NF-kappa-B to the nucleus and antagonizing the function of Tuba dynamin-binding protein, thus promoting bacterial spreading; perturbing morphology of host cell junctions by impairing host DNMBP (Tuba) and WASL interaction, altering cortical tension at the cell junctions and allowing bacteria to more efficiently form bacteria-filled cell protrusions, thus promoting bacterial spreading within infected tissues; down-regulator of host inflammation response; interaction with host I-kappa-B kinase alpha (IKKA, CHUK), preventing IKKA from phosphorylating NF-kappa-B inhibitor alpha (IKBA, NFKBIA) and thus delaying degradation of phospho-IKBA; impairing translocation of host transcription factor p65 (a subunit of NF-kappa-B, RELA) into the nucleus, thus preventing activation of NF-KB-regulated genes | <i>L. monocytogenes</i>            |
| <i>lap</i>            | Adhesion-mediating acetaldehyde/alcohol dehydrogenase LAP | Acetaldehyde dehydrogenase (acetylating) activity                                                                                                                                                                                                                                                                                                                                                                                                                                                                                                                                                                                                                                                                                                                                                                                                                                                          | <i>L. monocytogenes</i>            |
| <i>lsp</i>            | Lipoprotein signal peptidase                              | Catalyzing removal of signal peptides from prolipoproteins                                                                                                                                                                                                                                                                                                                                                                                                                                                                                                                                                                                                                                                                                                                                                                                                                                                 | <i>L. ivanovii</i>                 |
| <i>oppA</i>           | Putative oligopeptide ABC transporter-binding protein     | Binding protein; ATP-binding cassette (ABC) transporter complex, transmembrane transport                                                                                                                                                                                                                                                                                                                                                                                                                                                                                                                                                                                                                                                                                                                                                                                                                   | <i>L. ivanovii</i>                 |
| <i>rsbV</i>           | Anti-sigma b factor antagonist RsbV                       | Anti-sigma factor antagonist activity                                                                                                                                                                                                                                                                                                                                                                                                                                                                                                                                                                                                                                                                                                                                                                                                                                                                      | <i>L. monocytogenes</i>            |
| <i>tcsA</i>           | CD4+ T cell-stimulating antigen, lipoprotein              | Lipoprotein, putative CD4+ T cell-stimulating antigen                                                                                                                                                                                                                                                                                                                                                                                                                                                                                                                                                                                                                                                                                                                                                                                                                                                      | <i>L. ivanovii</i>                 |
| <i>tig</i>            | Trigger factor                                            | Protein export; chaperone protein by maintaining newly synthesized proteins in open conformation; peptidyl-prolyl <i>cis-trans</i> isomerase                                                                                                                                                                                                                                                                                                                                                                                                                                                                                                                                                                                                                                                                                                                                                               | <i>L. ivanovii</i>                 |

**Table S13.** The output of CRISPRCasFinder for the genome of three *Listeria ivanovii* isolates obtained from bulk-tank raw milk of sheep in Greece.

## (a) Isolate NGS01

| Element     | CRISPR Id / Cas Type                 | Start  | End    | Spacer / Gene | Repeat consensus / cas genes                                                                                  | Direction       |
|-------------|--------------------------------------|--------|--------|---------------|---------------------------------------------------------------------------------------------------------------|-----------------|
| CRISPR      | NODE_1_length_783016_cov_31_348182_1 | 36936  | 37222  | 4             | GTTTAAATTACTTATTGTGAAATGTAAAT                                                                                 | ND <sup>1</sup> |
| Cas cluster | General-Class1                       | 47089  | 55206  | 8             | Cas6_0_I-III, Cas8a1_0_IB, Cas7_1_IB,<br>Cas5_0_IB, Cas3_0_I, Cas4_0_I-II, Cas1_0_I-II-III, Cas2_0_I-II-III-V |                 |
| CRISPR      | NODE_1_length_783016_cov_31_348182_2 | 55405  | 55887  | 7             | GTTTAAATTACTTATTATGAAATGTAAAT                                                                                 | -               |
| CRISPR      | NODE_1_length_783016_cov_31_348182_3 | 325941 | 326341 | 6             | ACAACCAGCTAACGAATTTAGAT                                                                                       | +               |
| CRISPR      | NODE_4_length_347955_cov_33_429845_1 | 145397 | 145509 | 1             | AACGCGAGGATTTAATCCTTCGTGGAAGTT<br>TCAAAA                                                                      | +               |

## (b) Isolate NGS03

| Element     | CRISPR Id / Cas Type                 | Start  | End    | Spacer / Gene | Repeat consensus / cas genes                                                                                     | Direction |
|-------------|--------------------------------------|--------|--------|---------------|------------------------------------------------------------------------------------------------------------------|-----------|
| CRISPR      | NODE_1_length_782973_cov_32_715747_1 | 456678 | 457078 | 6             | ATCCAAATTCGTTAGCTGGTTGT                                                                                          | ND        |
| CRISPR      | NODE_1_length_782973_cov_32_715747_2 | 727086 | 727568 | 7             | ATTACATTTTCATAATAAGTAATTAAC                                                                                      | ND        |
| Cas cluster | General-Class1                       | 727767 | 735884 | 8             | Cas2_0_I-II-III-V, Cas1_0_I-II-III, Cas4_0_I-II,<br>Cas3_0_I, Cas5_0_IB, Cas7_1_IB, Cas8a1_0_IB,<br>Cas6_0_I-III |           |
| CRISPR      | NODE_1_length_782973_cov_32_715747_3 | 745753 | 746039 | 4             | ATTACATTTTCATAATAAGTAATTAAC                                                                                      | ND        |
| CRISPR      | NODE_4_length_238231_cov_34_868230_1 | 35676  | 35788  | 1             | AACGCGAGGATTTAATCCTTCGTGGAAGTT<br>TCAAAA                                                                         | +         |

## (c) Isolate NGS04

| Element     | CRISPR Id / Cas Type                 | Start  | End    | Spacer / Gene | Repeat consensus / cas genes                                                                                     | Direction |
|-------------|--------------------------------------|--------|--------|---------------|------------------------------------------------------------------------------------------------------------------|-----------|
| CRISPR      | NODE_1_length_782978_cov_43_621160_1 | 456677 | 457077 | 6             | ATCCAAATTCGTTAGCTGGTTGT                                                                                          | ND        |
| CRISPR      | NODE_1_length_782978_cov_43_621160_2 | 727090 | 727572 | 7             | ATTACATTTTCATAATAAGTAATTAAC                                                                                      | ND        |
| Cas cluster | General-Class1                       | 727771 | 735888 | 8             | Cas2_0_I-II-III-V, Cas1_0_I-II-III, Cas4_0_I-II,<br>Cas3_0_I, Cas5_0_IB, Cas7_1_IB, Cas8a1_0_IB,<br>Cas6_0_I-III |           |
| CRISPR      | NODE_1_length_782978_cov_43_621160_3 | 745756 | 746042 | 4             | ATTACATTTTCATAATAAGTAATTAAC                                                                                      | ND        |

|        |                                      |        |        |   |                                          |    |
|--------|--------------------------------------|--------|--------|---|------------------------------------------|----|
| CRISPR | NODE_3_length_462178_cov_42_292641_1 | 432571 | 432661 | 1 | AAATTTTTTCCAGTTTGTTTAAATT                | ND |
| CRISPR | NODE_4_length_347079_cov_44_764858_1 | 144514 | 144626 | 1 | AACGCGAGGATTTAATCCTTCGTGGAAGTT<br>TCAAAA | +  |

---

<sup>1</sup> Not Defined.
